# Supplementary material for: CO2 Transport by PIP2 Aquaporins of Barley
Source: PubMed Central journal article supplement (PMC3913445; doi:10.1093/pcp/pcu003), 2014-01-30
Supplement: supp_pcu003_pcp-2013-e-00412-File005.pdf [file supp_pcu003_pcp-2013-e-00412-File005.pdf]

## **Supplementary Materials and Methods**

### **Indirect immunofluorescence microscopy**

Oocytes were injected with 50 ng of *HvPIP* cRNAs and incubated for 24 h at 18°C. The oocytes were fixed in a 4 % (w/v) formaldehyde solution (pH 7.4) overnight. Fixed samples were embedded in 4% agarose. Oocytes were sliced (thickness: 50 µm) with a razor blade, then were treated with blocking solution (50 mM Tris pH 8.0, 150 mM NaCl, 0.1% Tween 20, 3% BSA) for 1 h at 25°C. After blocking, anti-HvPIP1 rat antibody (generated against the synthetic peptide MEGKEEDVRLGANRY, Medical & Biological Laboratories Co., Japan) or anti-HvPIP2;1 antibody (Horie et al. 2011) was applied to samples for 1 h at 25°C. After washing three times, the secondary antibodies (anti-rat IgG goat antibody conjugated with Alexa 647 [Invitrogen, Carlsbad, CA, USA] or anti-rabbit IgG goat antibody conjugated with Alexa 488 [Invitrogen, Carlsbad, CA, USA]) were applied for another 1 h. After washing twice with the TBS-T solution (50 mM Tris pH 8.0, 150 mM NaCl, 0.1% Tween 20) and once with TBS (50 mM Tris pH 8.0, 150 mM NaCl), samples were analyzed with a fluorescence microscope (BZ-8000, Keyence, Japan). Exposure time varied according to the fluorescence. Fluorescence intensity was measured along lines indicated in inset gray images (converted from color images) using WinRoof software (ver. 3.51, MITANI Corporation, 2000, Japan).

## **Supplementary Results**

### **Barley PIP1 did not localize to cell membrane in *X. laevis* oocytes**

Supplementary Fig. S2 shows that HvPIP1;2 did not localized in the cell membrane when *HvPIP1;2* cRNA was injected to the oocytes. Intensity of fluorescence of antibody against HvPIP2;1 was concentrated at the edge of the cell, namely in the cell membrane (Supplementary Fig. S2D). In contrast, the fluorescence of HvPIP1;2 was distributed evenly in the cell, indicating that HvPIP1;2 did not apparently accumulate in the cell membrane (Supplementary Fig. S2B). Essentially the same result was obtained for HvPIP1;4 (data not shown). Control oocytes injected with water showed virtually undetectable levels of the fluorescence (data not shown).

### **Twenty-five ng of carbonic anhydrase (CA) was enough for CO<sub>2</sub> permeability assay and PIP2s permeate CO<sub>2</sub>, not H<sub>2</sub>CO<sub>3</sub>**

It was reported that injection of carbonic anhydrase (CA) to the oocyte was essential for the measurement of CO<sub>2</sub> transport activity by cytosolic acidification (Nakhoul et al. 1998). They injected 50 ng CA per oocyte. However, the injection of 50 ng of CA was technically difficult, as it was viscous. Thus, we examined the effect of 25 ng CA on the CO<sub>2</sub> permeability (Supplementary Fig. S5). In the absence of CA, the acidification of oocytes induced by CO<sub>2</sub>-enriched buffer was apparently delayed, regardless of injection of *HvPIP2;1* cRNA. Injection of 25 ng per oocyte CA together with *HvPIP2;1* cRNA dramatically increased the rate of acidification. The injection of 25 ng per oocyte yielded a comparably high  $1/\tau$  to 50 ng per oocyte (Supplementary Fig. S5). Thus, we injected 25 ng CA per oocyte throughout this study.

CA catalyzes equilibration of CO<sub>2</sub> and H<sub>2</sub>CO<sub>3</sub> in a water environment. It is not possible to chemically discriminate CO<sub>2</sub> and H<sub>2</sub>CO<sub>3</sub> as a matter of fact. Which is the substrate of the aquaporins, CO<sub>2</sub> or H<sub>2</sub>CO<sub>3</sub>? The requirement of CA inside the cell suggests that the substrate is CO<sub>2</sub>, rather than H<sub>2</sub>CO<sub>3</sub>. CO<sub>2</sub> migrating inside the cell

through the aquaporins will be converted to  $\text{H}_2\text{CO}_3$  spontaneously by CA catalysis in the oocytes, which will in turn acidify the cytosol by dissociation to  $\text{H}^+$  and bicarbonate ion.

#### Supplementary Figure legends

Supplementary Fig. S1. CO<sub>2</sub> permeability (P<sub>CO2</sub>) of HvPIP2;3 with 4 amino acid substitutions at the carboxyl terminal stretch. (A) Illustrated presentation of HvPIP2;3<sup>(LFSR)</sup> construct. (B) P<sub>CO2</sub> of *X. laevis* oocytes injected with water, *HvPIP2;3* cRNA and *HvPIP2;3*<sup>(LFSR)</sup> cRNA. Error bar indicates standard error. Water, n = 5; HvPIP2;3, n = 5; HvPIP2;3<sup>(LFSR)</sup>, n = 4. (C) P<sub>f</sub> of *X. laevis* oocytes injected with water, *HvPIP2;3* cRNA and *HvPIP2;3*<sup>(LFSR)</sup> cRNA. Error bar indicates standard error. Water, n = 8; HvPIP2;3, n = 9; HvPIP2;3<sup>(LFSR)</sup>, n = 8.

Supplementary Fig. S2. Localization of HvPIP1;2 and HvPIP2;1 in *X. laevis* oocytes. (A) A fluorescent image of a sliced PIP1;2-expressing oocyte treated with anti-HvPIP1s antibody and anti-rat IgG (Alexa 647). Exposure: 0.55 sec, Bar: 100 μm. (B) Fluorescence intensity of (A) along the line indicated in the inset. (C) A fluorescent image of a sliced PIP2;1-expressing oocyte treated with the anti-HvPIP2;1 antibody and the anti-rabbit IgG (Alexa 488). Exposure: 0.002 sec, Bar: 100 μm. (D) Fluorescence intensity of (B) along the line indicated in the inset.

Supplementary Fig. S3. Amino acid alignment of the junction region of E-loop and transmembrane helix 6 of HvPIP2;1 to HvPIP2;5. Dagger indicates where I-254 of HvPIP2;3 and M-254 of HvPIP2;4 locate.

Supplementary Fig. S4. Alignment of partial sequences of deduced amino acids of PIP1 and PIP2 in *Arabidopsis thaliana*, *Oryza sativa*, *Zea mays* and *Hordeum vulgare*. The conserved isoleucine at the end of the E-loop is indicated by arrowhead, where M of HvPIP2;4 and V of ArPIP1;1 and AtPIP1;2 are exceptions. Accession number of maize PIP genes are Y243800 (ZmPIP1;1),



AF131201 (ZmPIP1;2), AF326487 (ZmPIP1;3), AF326488 (ZmPIP1;4),  
AF326489 (ZmPIP1;5), F326490 (ZmPIP1;6), AF326491 (ZmPIP2;1),  
AF326492 (ZmPIP2;2), AF326493 (ZmPIP2;3), F326494 (ZmPIP2;4),  
AF130975 (ZmPIP2;5), AF326495 (ZmPIP2;6) and AF326496 (ZmPIP2;7).

Supplementary Fig. S5. Effect of carbonic anhydrase (CA) on cytosolic acidification rate of *HvPIP2;1* cRNA-injected *X. laevis* oocytes. (A) Representative traces of pH decrease are shown. With CA, 25 ng carbonic anhydrase. Without CA, 0 ng carbonic anhydrase. Water, water-injected oocytes. *HvPIP2;1*, 50 ng *HvPIP2;1* cRNA-injected oocytes. Arrowheads indicate where the bath solution was replaced from 0.01 mM CO<sub>2</sub>/H<sub>2</sub>CO<sub>3</sub> to 6.5 mM CO<sub>2</sub>/H<sub>2</sub>CO<sub>3</sub>. Magenta line indicates original pH of the cytosol. (B) 1/τ of *HvPIP2;1* cRNA-injected *X. laevis* oocytes. CA was co-injected with *HvPIP2;1* cRNA at indicated amount per oocyte. The acidification was initiated by replacing the bath solution from 0.01 mM CO<sub>2</sub>/H<sub>2</sub>CO<sub>3</sub> to 6.5 mM. Error bars indicate standard error. 0 ng CA, n = 2; 25 ng CA, n = 4; 50 ng CA, n = 3.

Supplementary Fig. S6. A typical calibration line of pH electrode. pH electrodes were calibrated as mentioned in Materials and Methods.  $\Delta V = V_{\text{pH}} - V_r$ , where  $V_{\text{pH}}$  and  $V_r$  indicate outputs of the hydrogen ion selective microelectrode and the membrane potential microelectrode, respectively. The slope was -61.5 mV pH<sup>-1</sup> in the presented result. It was variable from -58.0 to -61.5 mV pH<sup>-1</sup>, pipette to pipette.

Supplementary Tables

Supplementary Table S1. CO<sub>2</sub> permeability and the semi-conserved amino acid residue motif at the end of the E-loop of PIP2 members

| Gene     | Amino acid residues at the end of the E-loop | CO <sub>2</sub> permeability | Reference  |
|----------|----------------------------------------------|------------------------------|------------|
| HvPIP2;1 | WIFWVGP                                      | Yes                          | a          |
| HvPIP2;2 | WIFWVGP                                      | Yes                          | a          |
| HvPIP2;3 | WIFWVGP                                      | Yes                          | a          |
| HvPIP2;4 | WMFWVGP                                      | No                           | a          |
| HvPIP2;5 | WIFWVGP                                      | Yes                          | a          |
| AtPIP1;2 | WVFWVGP                                      | Yes                          | b          |
| AtPIP2;3 | WIFWVGP                                      | No                           | b          |
| NtAQP1   | WIFWVGP                                      | Yes                          | b, c, d, e |
| NtPIP2;1 | WIFWVGP                                      | Yes/No                       | c, d       |
| SsAqpZ   | WLFWVGP                                      | Yes                          | f          |

a, this study; b, Heckwolf et al. 2011; c, Uehlein et al. 2012b; d, Otto et al. 2010; e, Uehlein et al. 2003; f, Ding et al. 2013

Supplementary Table S2. Setting of the puller

|        | Heat | Pull | Velocity | Time | Pressure |
|--------|------|------|----------|------|----------|
| Line 1 | 627  | 0    | 55       | 250  | 500      |
| Line 2 | 627  | 0    | 30       | 250  |          |
| Line 3 | 627  | 0    | 50       | 250  |          |

Supplementary Table S3. Primers for the construction of HvPIP2;3<sup>(M254I)</sup> and HvPIP2;4<sup>(I254M)</sup>

|                                 |                              |
|---------------------------------|------------------------------|
| For HvPIP2;3 <sup>(I254M)</sup> |                              |
| 23I254M_sen                     | gatgaccactggatgttctgggtggggc |
| 23I254M_ant                     | gcccaccagaacatccagtggtcatc   |
| For HvPIP2;4 <sup>(M254I)</sup> |                              |
| 24M254I_sen                     | gatgaccactggatcttctgggtggggc |
| 24M254I_ant                     | gcccaccagaagatccagtggtcatc   |

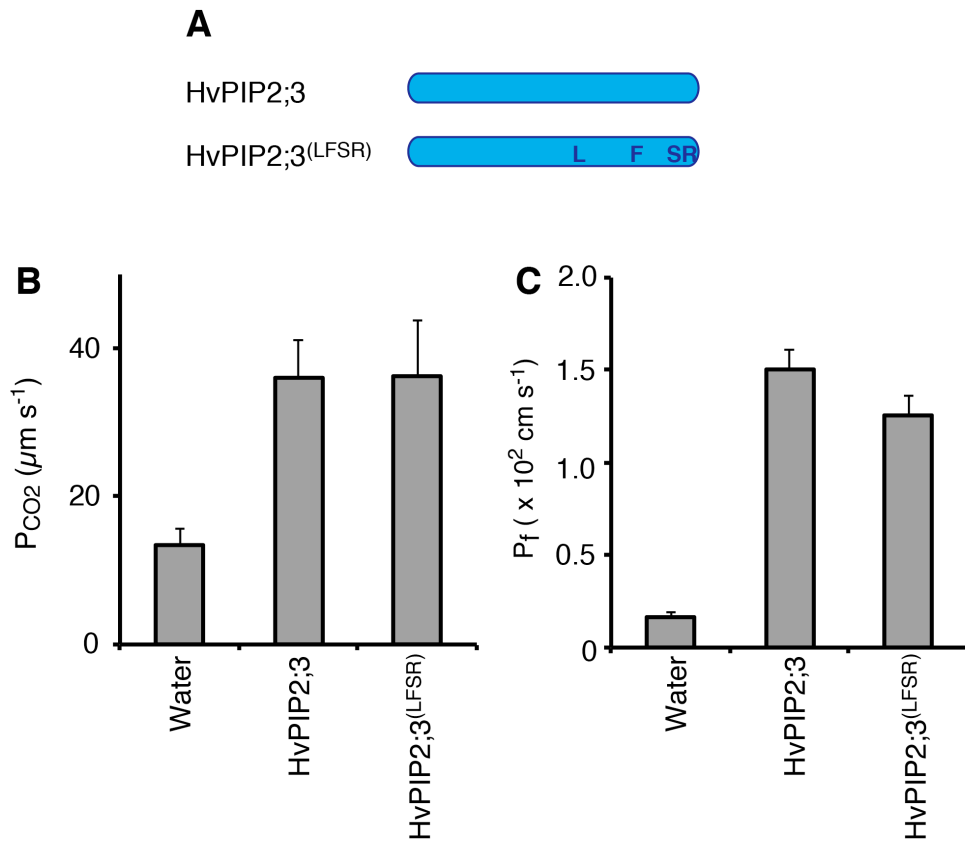

Supplementary Fig. S1.  $\text{CO}_2$  permeability ( $P_{\text{CO}_2}$ ) of HvPIP2;3 with 4 amino acid substitutions at the carboxyl terminal stretch. (A) Illustrated presentation of HvPIP2;3<sup>(LFSR)</sup> construct. (B)  $P_{\text{CO}_2}$  of *X. laevis* oocytes injected with water, HvPIP2;3 cRNA and HvPIP2;3<sup>(LFSR)</sup> cRNA. Error bar indicates standard error. Water,  $n = 5$ ; HvPIP2;3,  $n = 5$ ; HvPIP2;3<sup>(LFSR)</sup>,  $n = 4$ . (C)  $P_f$  of *X. laevis* oocytes injected with water, HvPIP2;3 cRNA and HvPIP2;3<sup>(LFSR)</sup> cRNA. Error bar indicates standard error. Water,  $n = 8$ ; HvPIP2;3,  $n = 9$ ; HvPIP2;3<sup>(LFSR)</sup>,  $n = 8$ .

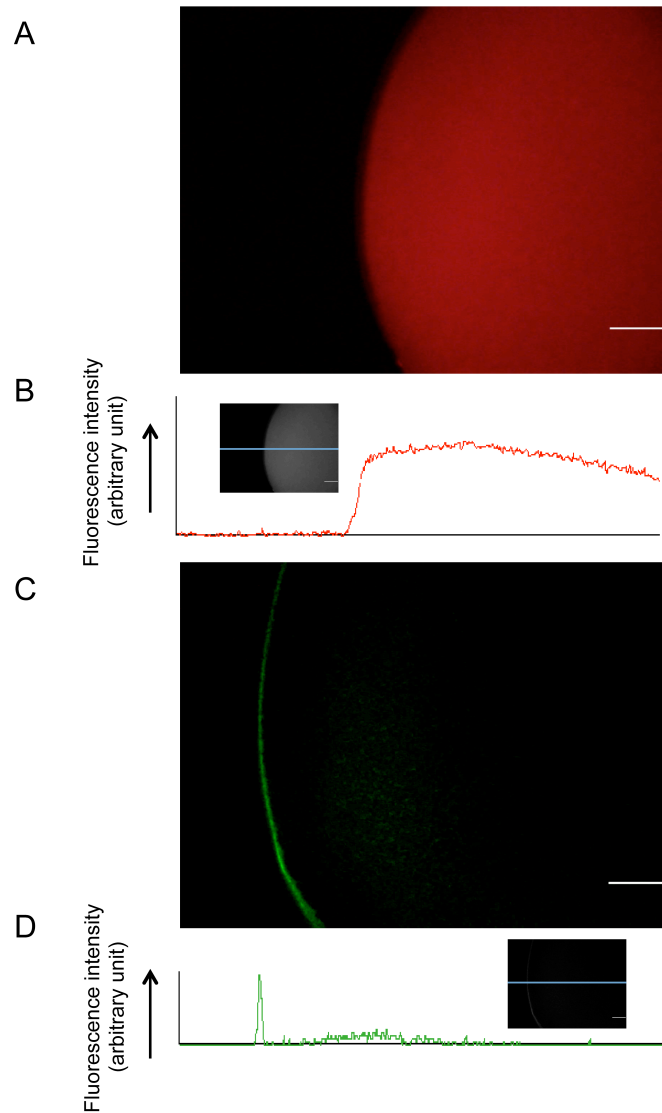

Supplementary Fig. S2. Localization of HvPIP1;2 and HvPIP2;1 in *X. laevis* oocytes. (A) A fluorescent image of a sliced PIP1;2-expressing oocyte treated with anti-HvPIP1s antibody and anti-rat IgG (Alexa 647). Exposure: 0.55 sec, Bar: 100  $\mu$ m. (B) Fluorescence intensity of (A) along the line indicated in the inset. (C) A fluorescent image of a sliced PIP2;1-expressing oocyte treated with the anti-HvPIP2;1 antibody and the anti-rabbit IgG (Alexa 488). Exposure: 0.002 sec, Bar: 100  $\mu$ m. (D) Fluorescence intensity of (B) along the line indicated in the inset.

|          |            |            |             |
|----------|------------|------------|-------------|
|          |            | †          |             |
| HvPIP2;1 | AVIYNTDKAW | DDQWIFWVGP | LIGAAIAAAAY |
| HvPIP2;2 | AVIYNKKAAW | DNHWIFWVGP | FVGALAAAAY  |
| HvPIP2;3 | AVIYNNEKAW | DDHWIFWVGP | FIGAAIAAAAY |
| HvPIP2;4 | AVIYNNEKAW | DDHWMFWVGP | FIGAAIAAALY |
| HvPIP2;5 | AVIYNKDKAW | DDQWIFWVGP | MIGAAIAAFY  |

Supplementary Fig. S3. Amino acid alignment of the junction region of E-loop and transmembrane helix 6 of HvPIP2;1 to HvPIP2;5. Dagger indicates where I-254 of HvPIP2;3 and M-254 of HvPIP2;4 locate.

▼

```

AtPIP2_7      FAVFMVHLATIPITGTGINPARSFGAAVIYNN--EKAWDDQWIFWVGPFVGLGALAAAAAYHQ
AtPIP2_8      FAVFMVHLATIPITGTGINPARSFGAAVIYNN--EKAWDDHWIFWVGPFVGLGALAAAAAYHQ
OsPIP2_2      FAVFMVHLATIPITGTGINPARSIGAAVIYNQ--KKAWDDHWIFWAGPFIGALAAAAAYHQ
HvPIP2_2      FAVFMVHLATIPITGTGINPARSLGAAVIYNK--KAADNHWIFWVGPFVGLGALAAAAAYHQ
AtPIP2_2      FAVFMVHLATIPITGTGINPARSFGAAVIYNK--SKPWDDHWIFWVGPFVGLGAAIAAFYHQ
AtPIP2_3      FAVFMVHLATIPITGTGINPARSFGAAVIFNK--SKPWDDHWIFWVGPFVGLGAAIAAFYHQ
AtPIP2_1      FAVFMVHLATIPITGTGINPARSFGAAVIYNK--SKPWDDHWIFWVGPFVGLGAAIAAFYHQ
AtPIP2_4      FAVFMVHLATIPITGTGINPARSFGAAVIYNN--EKAWDDQWIFWVGPMIGAAAAAFYHQ
AtPIP2_6      FSVFMVHLATIPITGTGINPARSFGAAVIYNN--QKAWDDQWIFWVGPFVGLGAAIAAFYHQ
AtPIP2_5      FAVFIVHLATIPITGTGINPARSLGAAIYIYK--DKAWDDHWIFWVGPFVGLGAAIAAFYHQ
OsPIP2_1      FAVFMVHLATIPITGTGINPARSLGTAVIYNK--DKAWDDQWIFWVGPFVGLGAAIAAAAYHQ
HvPIP2_1      FAVFMVHLATIPITGTGINPARSLGAAVIYNT--DKAWDDQWIFWVGPFVGLGAAIAAAAYHQ
ZmPIP2_3      FAVFMVHLATIPITGTGINPARSLGAAVIYNK--DKAWDDQWIFWVGPFVGLGAAIAAAAYHQ
ZmPIP2_4      FAVFMVHLATIPITGTGINPARSLGAAVIYNK--DKAWDDQWIFWVGPFVGLGAAIAAAAYHQ
OsPIP2_3      FAVFMVHLATIPITGTGINPARSLGAAVIYNN--HKAWDDHWIFWVGPFVGLGAAIAAAAYHQ
ZmPIP2_5      FAVFMVHLATIPITGTGINPARSLGAAVIYNN--DKAWDDHWIFWVGPFVGLGAAIAAAAYHQ
HvPIP2_3      FAVFMVHLATIPITGTGINPARSFGAAVIYNN--EKAWDDHWIFWVGPFVGLGAAIAAAAYHQ
HvPIP2_4      FAVFMVHLATIPITGTGINPARSFGAAVIYNN--EKAWDDHWMFVVGPFVGLGAAIAALYHQ
OsPIP2_4      FAVFMVHLATIPITGTGINPARSLGVAVVYNN--NKAWSDQWIFWVGPFVGLGAAIAALYHQ
ZmPIP2_6      FAVFMVHLATIPITGTGINPARSLGAAVVYNN--SKAWSDQWIFWVGPFVGLGAAIAALYHQ
OsPIP2_5      FAVFMVHLATIPVTGTGINPARSLGAAVVYNN--SKAWSDQWIFWVGPFVGLGAAIAALYHQ
ZmPIP2_1      FAVFMVHLATIPVTGTGINPARSLGAAVIYNK--DKPWDDHWIFWVGPFVGLGAAIAAFYHQ
ZmPIP2_2      FAVFMVHLATIPVTGTGINPARSLGAAVVYNK--DKPWDDHWIFWVGPFVGLGAAIAAFYHQ
OsPIP2_6      FAVFMVHLATIPITGTGINPARSIGAAVIFNN--EKAWHNNHWIFWVGPFVGLGAAIAAFYHQ
HvPIP2_5      FAVFMVHLATIPITGTGINPARSLGAAVIYNK--DKAWDDQWIFWVGPMIGAAIAAFYHQ
ZmPIP2_7      FAVFMVHLATIPVTGTGINPARSFGPAVIFNN--DKAWDDQWIYVVGPFVGLGAAVAAIYHQ
OsPIP2_7      LAVLVVHLATIPITGTGINPARSLGPLVLGLGTTKAWSHLWIFWVGPFVGLGAAAAMIYHH
OsPIP2_8      FAVFVVHLATIPITGTGINPARSLGAAVLYNQ--HAAWKDHWIFWVGPFVGLGAAIAAFYHK
OsPIP2_9      FAVFVVHLATIPITGTGINPARSFGAAVVYNN--PNAWHDQWIFWVGPFVGLGAAIAATLYHE
AtPIP1_1      FAVFLVHLATIPITGTGINPARSLGAAIYIYK--DHSWDDHWVWVGPFVGLGAAALAYHV
AtPIP1_2      FAVFLVHLATIPITGTGINPARSLGAAIIFNK--DNAWDDHWVWVGPFVGLGAAALAYHV
AtPIP1_4      FAVFLVHLATIPITGTGINPARSLGAAIYIYK--DHSWDDHWIFWVGPFVGLGAAALAYHQ
AtPIP1_3      FAVFLVHLATIPITGTGINPARSLGAAIYIYK--DHAWDDHWIFWVGPFVGLGAAALAYHQ
AtPIP1_5      FAVFLVHLATIPITGTGINPARSLGAAIYIYK--DHAWDDHWIFWVGPFVGLGAAALAYHQ
ZmPIP1_3      FAVFLVHLATIPITGTGINPARSLGAAIYIYK--DHAWSDHWIFWVGPFVGLGAAALAYHQ
ZmPIP1_4      FAVFLVHLATIPITGTGINPARSLGAAIYIYK--DHAWSDHWIFWVGPFVGLGAAALAYHQ
ZmPIP1_2      FAVFLVHLATIPITGTGINPARSLGAAIYIYK--DHAWNDHWIFWVGPFVGLGAAALAYHQ
OsPIP1_1      FAVFLVHLATIPITGTGINPARSLGAAIYIYK--DHAWNDHWIFWVGPFVGLGAAALAYHQ
ZmPIP1_1      FAVFLVHLATIPITGTGINPARSLGAAVIYNN--HHAWADHWIFWVGPFVGLGAAALAYHQ
HvPIP1_5      FAVFLVHLATIPITGTGINPARSLGAAIYIYK--DHAWNDHWIFWVGPFVGLGAAALAYHQ
HvPIP1_1      FAVFLVHLATIPITGTGINPARSLGAAIYIYK--EHAWSDHWIFWVGPFVGLGAAALAYHQ
OsPIP1_2      FAVFLVHLATIPITGTGINPARSLGAAIYIYK--AHAWDDHWIFWVGPFVGLGAAALAYHV
ZmPIP1_5      FAVFLVHLATIPITGTGINPARSLGAAIYIYK--SHAWNDHWIFWVGPFVGLGAAALAYHV
HvPIP1_2      FAVFLVHLATIPITGTGINPARSLGAAIYIYK--KQSWDDHWIFWVGPFVGLGAAALAYHV
HvPIP1_4      FAVFLVHLATIPITGTGINPARSLGAAIYIYK--KQAWDDHWIFWVGPFVGLGAAALAYHV
HvPIP1_3      FAVFLVHLATIPITGTGINPARSLGAAIYIYK--KQAWDDHWIFWVGPFVGLGAAALAYHV
ZmPIP1_6      FAVFLVHLATIPITGTGINPARSLGAAIYIDN--PHGWGHWFVVGPFVGLGAAALAYHQ
OsPIP1_3      FAVFLVHLATIPITGTGINPARSLGAAIYIYK--GHAWDDHWIFWVGPFVGLGAAALAYHQ

```

Supplementary Fig. S4. Alignment of partial sequences of deduced amino acids of PIP1 and PIP2 in *Arabidopsis thaliana*, *Oryza sativa*, *Zea mays* and *Hordeum vulgare*. The conserved isoleucine at the end of the E-loop is indicated by arrowhead, where M of HvPIP2;4 and V of ArPIP1;1 and AtPIP1;2 are exceptions. Accession number of maize PIP genes are Y243800 (ZmPIP1;1), AF131201 (ZmPIP1;2), AF326487 (ZmPIP1;3), AF326488 (ZmPIP1;4),

AF326489 (ZmPIP1;5), F326490 (ZmPIP1;6), AF326491 (ZmPIP2;1),  
AF326492 (ZmPIP2;2), AF326493 (ZmPIP2;3), F326494 (ZmPIP2;4),  
AF130975 (ZmPIP2;5), AF326495 (ZmPIP2;6) and AF326496 (ZmPIP2;7).

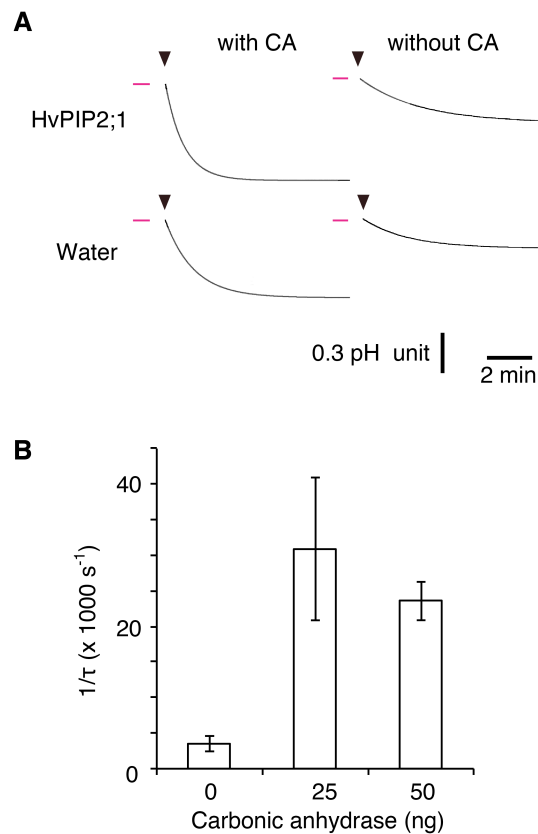

Supplementary Fig. S5. Effect of carbonic anhydrase (CA) on cytosolic acidification rate of *HvPIP2;1* cRNA-injected *X. laevis* oocytes. (A) Representative traces of pH decrease are shown. With CA, 25 ng carbonic anhydrase. Without CA, 0 ng carbonic anhydrase. Water, water-injected oocytes. HvPIP2;1, 50 ng *HvPIP2;1* cRNA-injected oocytes. Arrowheads indicate where the bath solution was replaced from 0.01 mM CO<sub>2</sub>/H<sub>2</sub>CO<sub>3</sub> to 6.5 mM CO<sub>2</sub>/H<sub>2</sub>CO<sub>3</sub>. Magenta line indicates original pH of the cytosol. (B) 1/τ of *HvPIP2;1* cRNA-injected *X. laevis* oocytes. CA was co-injected with *HvPIP2;1* cRNA at indicated amount per oocyte. The acidification was initiated by replacing the bath solution from 0.01 mM CO<sub>2</sub>/H<sub>2</sub>CO<sub>3</sub> to 6.5 mM. Error bars indicate standard error. 0 ng CA, n = 2; 25 ng CA, n = 4; 50 ng CA, n = 3.



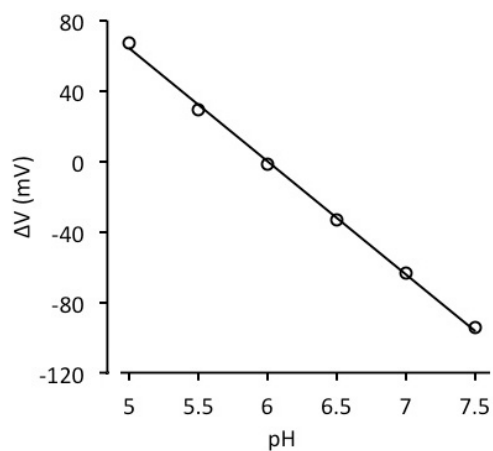

Supplementary Fig. S6. A typical calibration line of pH electrode. pH electrodes were calibrated as mentioned in Materials and Methods.  $\Delta V = V_{\text{pH}} - V_r$ , where  $V_{\text{pH}}$  and  $V_r$  indicate outputs of the hydrogen ion selective microelectrode and the membrane potential microelectrode, respectively. The slope was  $-61.5 \text{ mV pH}^{-1}$  in the presented result. It was variable from  $-58.0$  to  $-61.5 \text{ mV pH}^{-1}$ , pipette to pipette.
